# Supplementary material
Source: MDPI journal article supplement (https://www.mdpi.com/2071-1050/14/23/15807)
Supplement: s1 [file s1]

## Struvite Production from Dairy Processing Waste

Shane McIntosh \*, Louise Hunt, Emma Thompson Brewster, Andrew Rose, Aaron Thornton  
and Dirk Erler

Faculty of Science and Engineering, Southern Cross University, Lismore, NSW 2480, Australia

\*Corresponding author: [dirk.erler@scu.edu.au](mailto:dirk.erler@scu.edu.au)

**Table S1.** Experimental matrix and quantitative  $\text{PO}_4^{3-}$  reduction from AD wastewater following struvite precipitation.

| TEMP (oC) | pH | MgCl2 dose | Phosphate % reduction | TEMP (oC) | pH | MgCl2 dose | Phosphate % reduction |
|-----------|----|------------|-----------------------|-----------|----|------------|-----------------------|
| 10        | 7  | 0          | 8.50                  | 20        | 7  | 0          | -5.41                 |
| 10        | 7  | 0          | 14.25                 | 20        | 7  | 0          | 19.35                 |
| 10        | 8  | 0          | -2.23                 | 20        | 8  | 0          | 2.31                  |
| 10        | 8  | 0          | 7.68                  | 20        | 8  | 0          | 11.03                 |
| 10        | 9  | 0          | 10.54                 | 20        | 9  | 0          | 22.10                 |
| 10        | 9  | 0          | 13.51                 | 20        | 9  | 0          | 22.19                 |
| 10        | 10 | 0          | 34.35                 | 20        | 10 | 0          | 31.30                 |
| 10        | 10 | 0          | 35.31                 | 20        | 10 | 0          | 27.87                 |
| 10        | 7  | 0.5:1      | -6.48                 | 20        | 7  | 0.5:1      | 7.50                  |
| 10        | 7  | 0.5:1      | -21.12                | 20        | 7  | 0.5:1      | -2.68                 |
| 10        | 8  | 0.5:1      | 12.09                 | 20        | 8  | 0.5:1      | 18.91                 |
| 10        | 8  | 0.5:1      | 8.59                  | 20        | 8  | 0.5:1      | 11.21                 |
| 10        | 9  | 0.5:1      | 12.21                 | 20        | 9  | 0.5:1      | 46.95                 |
| 10        | 9  | 0.5:1      | 13.57                 | 20        | 9  | 0.5:1      | 47.94                 |
| 10        | 10 | 0.5:1      | 60.36                 | 20        | 10 | 0.5:1      | 63.94                 |
| 10        | 10 | 0.5:1      | 64.01                 | 20        | 10 | 0.5:1      | 67.71                 |
| 10        | 7  | 1.1        | -12.30                | 20        | 7  | 1.1        | 7.08                  |
| 10        | 7  | 1.1        | -5.05                 | 20        | 7  | 1.1        | 13.93                 |
| 10        | 8  | 1.1        | 4.71                  | 20        | 8  | 1.1        | 14.47                 |
| 10        | 8  | 1.1        | -4.41                 | 20        | 8  | 1.1        | 27.57                 |
| 10        | 9  | 1.1        | 61.39                 | 20        | 9  | 1.1        | 69.58                 |
| 10        | 9  | 1.1        | 73.75                 | 20        | 9  | 1.1        | 70.89                 |
| 10        | 10 | 1.1        | 89.67                 | 20        | 10 | 1.1        | 76.11                 |
| 10        | 10 | 1.1        | 88.75                 | 20        | 10 | 1.1        | 76.02                 |
| 10        | 7  | 1.5:1      | -7.12                 | 20        | 7  | 1.5:1      | 7.05                  |
| 10        | 7  | 1.5:1      | -0.62                 | 20        | 7  | 1.5:1      | 8.10                  |
| 10        | 8  | 1.5:1      | 7.43                  | 20        | 8  | 1.5:1      | 27,36                 |

|    |    |       |        |    |    |       |       |
|----|----|-------|--------|----|----|-------|-------|
| 10 | 8  | 1.5:1 | 18.05  | 20 | 8  | 1.5:1 | 31.70 |
| 10 | 9  | 1.5:1 | 78.65  | 20 | 9  | 1.5:1 | 72.15 |
| 10 | 9  | 1.5:1 | 78.28  | 20 | 9  | 1.5:1 | 63.43 |
| 10 | 10 | 1.5:1 | 89.05  | 20 | 10 | 1.5:1 | 81.82 |
| 10 | 10 | 1.5:1 | 83.39  | 20 | 10 | 1.5:1 | 79.23 |
| 10 | 7  | 2:1   | -14.74 | 20 | 7  | 2:1   | -3.83 |
| 10 | 7  | 2:1   | -2.83  | 20 | 7  | 2:1   | 11.78 |
| 10 | 8  | 2:1   | 17.85  | 20 | 8  | 2:1   | 35.85 |
| 10 | 8  | 2:1   | 26.67  | 20 | 8  | 2:1   | 34.29 |
| 10 | 9  | 2:1   | 90.77  | 20 | 9  | 2:1   | 74.39 |
| 10 | 9  | 2:1   | 88.71  | 20 | 9  | 2:1   | 77.42 |
| 10 | 10 | 2:1   | 90.27  | 20 | 10 | 2:1   | 90.28 |
| 10 | 10 | 2:1   | 89.54  | 20 | 10 | 2:1   | 92.59 |
| 10 | 7  | 10:1  | 3.30   | 20 | 7  | 10:1  | -0.78 |
| 10 | 7  | 10:1  | 4.18   | 20 | 7  | 10:1  | 10.81 |
| 10 | 8  | 10:1  | 47.59  | 20 | 8  | 10:1  | 54.92 |
| 10 | 8  | 10:1  | 46.48  | 20 | 8  | 10:1  | 64.63 |
| 10 | 9  | 10:1  | 87.25  | 20 | 9  | 10:1  | 68.96 |
| 10 | 9  | 10:1  | 87.90  | 20 | 9  | 10:1  | 64.58 |
| 10 | 10 | 10:1  | 88.67  | 20 | 10 | 10:1  | 86.27 |
| 10 | 10 | 10:1  | 86.59  | 20 | 10 | 10:1  | 89.38 |
| 10 | 7  | 20:1  | -5.42  | 20 | 7  | 20:1  | 3.36  |
| 10 | 7  | 20:1  | -0.95  | 20 | 7  | 20:1  | 16.22 |
| 10 | 8  | 20:1  | 30.45  | 20 | 8  | 20:1  | 55.11 |
| 10 | 8  | 20:1  | 44.05  | 20 | 8  | 20:1  | 68.22 |
| 10 | 9  | 20:1  | 88.18  | 20 | 9  | 20:1  | 69.68 |
| 10 | 9  | 20:1  | 90.43  | 20 | 9  | 20:1  | 68.94 |
| 10 | 10 | 20:1  | 91.59  | 20 | 10 | 20:1  | 82.46 |
| 10 | 10 | 20:1  | 91.44  | 20 | 10 | 20:1  | 78.15 |
| 10 | 7  | 30:1  | -11.71 | 20 | 7  | 30:1  | 3.48  |
| 10 | 7  | 30:1  | -0.91  | 20 | 7  | 30:1  | 0.48  |
| 10 | 8  | 30:1  | 63.77  | 20 | 8  | 30:1  | 57.50 |
| 10 | 8  | 30:1  | 63.54  | 20 | 8  | 30:1  | 67.12 |
| 10 | 9  | 30:1  | 87.23  | 20 | 9  | 30:1  | 83.38 |
| 10 | 9  | 30:1  | 84.54  | 20 | 9  | 30:1  | 84.08 |
| 10 | 10 | 30:1  | 91.31  | 20 | 10 | 30:1  | 91.64 |
| 10 | 10 | 30:1  | 81.68  | 20 | 10 | 30:1  | 91.60 |
| 10 | 7  | 40:1  | 6.04   | 20 | 7  | 40:1  | -0.29 |
| 10 | 7  | 40:1  | 4.19   | 20 | 7  | 40:1  | 16.50 |
| 10 | 8  | 40:1  | 44.82  | 20 | 8  | 40:1  | 62.31 |
| 10 | 8  | 40:1  | 47.74  | 20 | 8  | 40:1  | 60.08 |
| 10 | 9  | 40:1  | 84.63  | 20 | 9  | 40:1  | 82.02 |
| 10 | 9  | 40:1  | 85.82  | 20 | 9  | 40:1  | 85.94 |
| 10 | 10 | 40:1  | 87.57  | 20 | 10 | 40:1  | 78.89 |
| 10 | 10 | 40:1  | 80.25  | 20 | 10 | 40:1  | 84.16 |

| TEMP (oC) | pH | MgCl2 dose | Phosphate % reduction | TEMP (oC) | pH | MgCl2 dose | Phosphate % reduction |
|-----------|----|------------|-----------------------|-----------|----|------------|-----------------------|
| 30        | 7  | 0          | 5.24                  | 40        | 7  | 0          | 19.77                 |
| 30        | 7  | 0          | -1.38                 | 40        | 7  | 0          | 22.19                 |
| 30        | 8  | 0          | 9.38                  | 40        | 8  | 0          | 16.18                 |
| 30        | 8  | 0          | 7.85                  | 40        | 8  | 0          | 25.34                 |
| 30        | 9  | 0          | 33.06                 | 40        | 9  | 0          | 49.15                 |
| 30        | 9  | 0          | 27.61                 | 40        | 9  | 0          | 43.92                 |
| 30        | 10 | 0          | 36.11                 | 40        | 10 | 0          | 42.77                 |
| 30        | 10 | 0          | 40.34                 | 40        | 10 | 0          | 55.57                 |
| 30        | 7  | 0.5:1      | 1.74                  | 40        | 7  | 0.5:1      | 14.22                 |
| 30        | 7  | 0.5:1      | -0.21                 | 40        | 7  | 0.5:1      | 13.62                 |
| 30        | 8  | 0.5:1      | 10.25                 | 40        | 8  | 0.5:1      | 30.69                 |
| 30        | 8  | 0.5:1      | 3.04                  | 40        | 8  | 0.5:1      | 28.22                 |
| 30        | 9  | 0.5:1      | 65.41                 | 40        | 9  | 0.5:1      | 49.95                 |
| 30        | 9  | 0.5:1      | 51.16                 | 40        | 9  | 0.5:1      | 47.95                 |
| 30        | 10 | 0.5:1      | 81.44                 | 40        | 10 | 0.5:1      | 65.83                 |
| 30        | 10 | 0.5:1      | 76.04                 | 40        | 10 | 0.5:1      | 54.96                 |
| 30        | 7  | 1.1        | -1.45                 | 40        | 7  | 1.1        | 18.99                 |
| 30        | 7  | 1.1        | -4.43                 | 40        | 7  | 1.1        | 15.17                 |
| 30        | 8  | 1.1        | 13.03                 | 40        | 8  | 1.1        | 27.29                 |
| 30        | 8  | 1.1        | 32.02                 | 40        | 8  | 1.1        | 33.87                 |
| 30        | 9  | 1.1        | 53.15                 | 40        | 9  | 1.1        | 51.34                 |
| 30        | 9  | 1.1        | 55.12                 | 40        | 9  | 1.1        | 61.12                 |
| 30        | 10 | 1.1        | 76.64                 | 40        | 10 | 1.1        | 75.16                 |
| 30        | 10 | 1.1        | 74.54                 | 40        | 10 | 1.1        | 74.96                 |
| 30        | 7  | 1.5:1      | -7.59                 | 40        | 7  | 1.5:1      | 18.93                 |
| 30        | 7  | 1.5:1      | -2.62                 | 40        | 7  | 1.5:1      | 12.96                 |
| 30        | 8  | 1.5:1      | 35.20                 | 40        | 8  | 1.5:1      | 26.67                 |
| 30        | 8  | 1.5:1      | 30.58                 | 40        | 8  | 1.5:1      | 31.93                 |
| 30        | 9  | 1.5:1      | 66.31                 | 40        | 9  | 1.5:1      | 58.27                 |
| 30        | 9  | 1.5:1      | 75.04                 | 40        | 9  | 1.5:1      | 59.62                 |
| 30        | 10 | 1.5:1      | 81.25                 | 40        | 10 | 1.5:1      | 77.85                 |
| 30        | 10 | 1.5:1      | 88.65                 | 40        | 10 | 1.5:1      | 78.54                 |
| 30        | 7  | 2:1        | -10.22                | 40        | 7  | 2:1        | 31.93                 |
| 30        | 7  | 2:1        | 10.58                 | 40        | 7  | 2:1        | 22.19                 |
| 30        | 8  | 2:1        | 46.99                 | 40        | 8  | 2:1        | 27.31                 |
| 30        | 8  | 2:1        | 42.43                 | 40        | 8  | 2:1        | 32.73                 |
| 30        | 9  | 2:1        | 73.23                 | 40        | 9  | 2:1        | 51.43                 |
| 30        | 9  | 2:1        | 68.50                 | 40        | 9  | 2:1        | 62.46                 |
| 30        | 10 | 2:1        | 89.80                 | 40        | 10 | 2:1        | 78.87                 |
| 30        | 10 | 2:1        | 73.48                 | 40        | 10 | 2:1        | 83.29                 |
| 30        | 7  | 10:1       | 3.39                  | 40        | 7  | 10:1       | 24.54                 |
| 30        | 7  | 10:1       | 6.70                  | 40        | 7  | 10:1       | 23.23                 |
| 30        | 8  | 10:1       | 45.64                 | 40        | 8  | 10:1       | 44.14                 |
| 30        | 8  | 10:1       | 41.26                 | 40        | 8  | 10:1       | 31.53                 |

|    |    |      |       |    |    |      |       |
|----|----|------|-------|----|----|------|-------|
| 30 | 9  | 10:1 | 85.26 | 40 | 9  | 10:1 | 56.92 |
| 30 | 9  | 10:1 | 71.37 | 40 | 9  | 10:1 | 75.49 |
| 30 | 10 | 10:1 | 86.69 | 40 | 10 | 10:1 | 78.34 |
| 30 | 10 | 10:1 | 78.42 | 40 | 10 | 10:1 | 86.25 |
| 30 | 7  | 20:1 | 1.33  | 40 | 7  | 20:1 | 15.31 |
| 30 | 7  | 20:1 | 1.70  | 40 | 7  | 20:1 | 10.50 |
| 30 | 8  | 20:1 | 50.92 | 40 | 8  | 20:1 | 33.38 |
| 30 | 8  | 20:1 | 60.88 | 40 | 8  | 20:1 | 41.53 |
| 30 | 9  | 20:1 | 85.90 | 40 | 9  | 20:1 | 68.71 |
| 30 | 9  | 20:1 | 77.74 | 40 | 9  | 20:1 | 61.69 |
| 30 | 10 | 20:1 | 78.73 | 40 | 10 | 20:1 | 85.10 |
| 30 | 10 | 20:1 | 87.10 | 40 | 10 | 20:1 | 92.85 |
| 30 | 7  | 30:1 | -3.96 | 40 | 7  | 30:1 | 18.62 |
| 30 | 7  | 30:1 | 0.04  | 40 | 7  | 30:1 | 32.64 |
| 30 | 8  | 30:1 | 51.62 | 40 | 8  | 30:1 | 34.16 |
| 30 | 8  | 30:1 | 60.20 | 40 | 8  | 30:1 | 33.61 |
| 30 | 9  | 30:1 | 73.58 | 40 | 9  | 30:1 | 60.73 |
| 30 | 9  | 30:1 | 63.44 | 40 | 9  | 30:1 | 59.52 |
| 30 | 10 | 30:1 | 81.14 | 40 | 10 | 30:1 | 86.28 |
| 30 | 10 | 30:1 | 90.53 | 40 | 10 | 30:1 | 96.14 |
| 30 | 7  | 40:1 | 2.96  | 40 | 7  | 40:1 | 28.22 |
| 30 | 7  | 40:1 | 7.18  | 40 | 7  | 40:1 | 19.27 |
| 30 | 8  | 40:1 | 61.94 | 40 | 8  | 40:1 | 53.91 |
| 30 | 8  | 40:1 | 66.36 | 40 | 8  | 40:1 | 53.10 |
| 30 | 9  | 40:1 | 69.39 | 40 | 9  | 40:1 | 73.42 |
| 30 | 9  | 40:1 | 80.24 | 40 | 9  | 40:1 | 80.05 |
| 30 | 10 | 40:1 | 78.69 | 40 | 10 | 40:1 | 88.18 |
| 30 | 10 | 40:1 | 93.07 | 40 | 10 | 40:1 | 95.88 |

**Table S2.** Final concentration ( $\mu\text{mol/L}$ ) of  $\text{PO}_4^{3-}$  and  $\text{NH}_4^+$  for blended feedstocks as calculated from raw compositions.

| Feedstock<br>blends | AD<br>(mL) | HL<br>(mL) | AT<br>(mL) | $\text{PO}_4^{3-}$<br>( $\mu\text{mol/L}$ ) | $\text{NH}_4^+$<br>( $\mu\text{mol/L}$ ) | $\text{Ca}^{2+}$<br>( $\mu\text{mol/L}$ ) | Final<br>pH |
|---------------------|------------|------------|------------|---------------------------------------------|------------------------------------------|-------------------------------------------|-------------|
| AD+HL               | 29         | 121        |            | 2053.1                                      | 2053.1                                   | 274.8                                     | 4.26        |
| AD+AT               | 28         |            | 163        | 1404.1                                      | 1404.1                                   | 743.9                                     | 6.57        |
| AD+HL+AT            | 29         | 70         | 70         | 1737.9                                      | 1737.9                                   | 1888.1                                    | 4.88        |

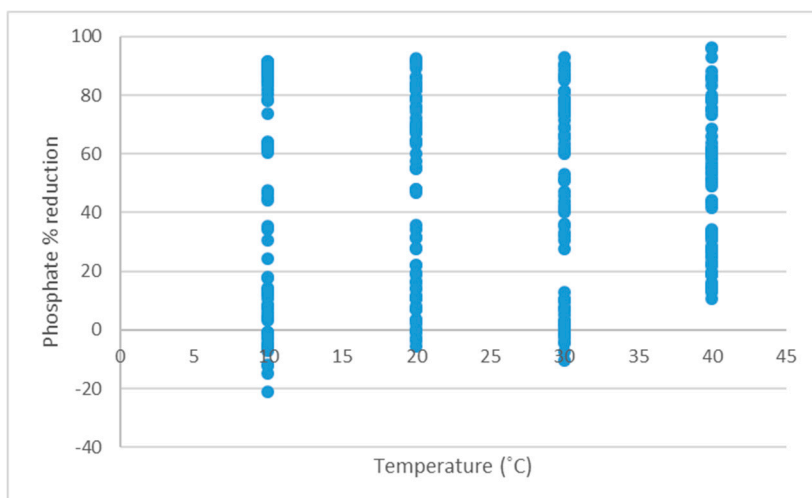

**Figure S1.** Raw data for temperature and  $\text{PO}_4^{3-}$  reduction indicating a small potential relationship.

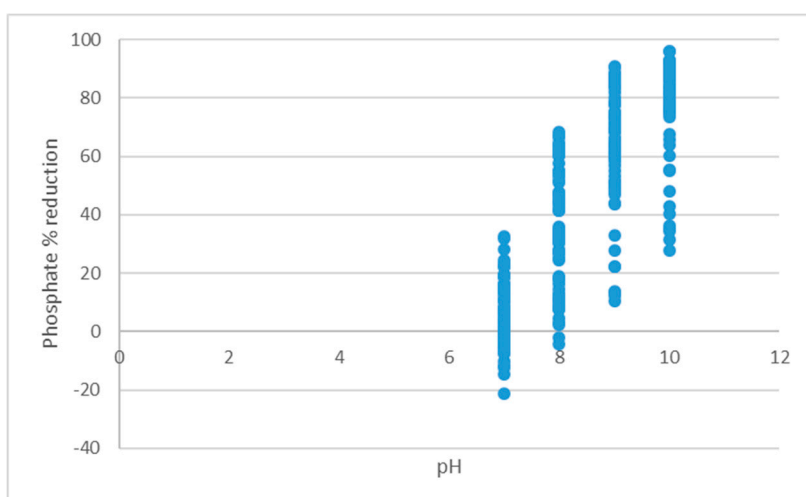

**Figure S2.** Raw data for pH and  $\text{PO}_4^{3-}$  reduction indicating a likely relationship.

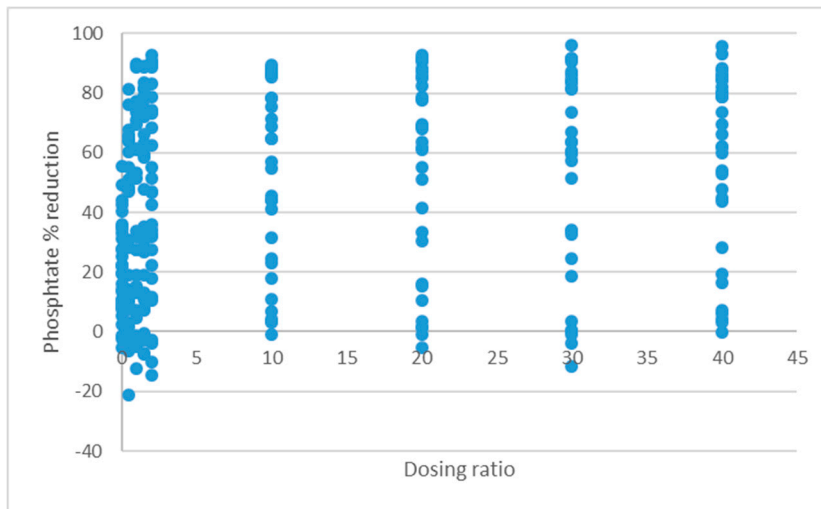

**Figure S3.** Raw data for dosing ratio and  $\text{PO}_4^{3-}$  reduction indicating an unlikely potential relationship.

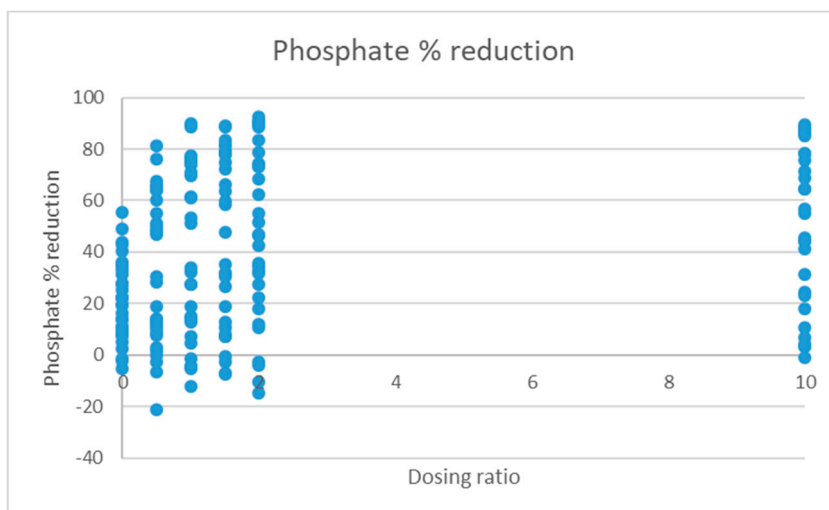

**Figure S4.** Raw data for dosing ratio and  $\text{PO}_4^{3-}$  reduction on a smaller x-axis range indicating an unlikely potential relationship

**Table S3.** P-values for sequential regressions identifying important factors to the linear model.

| Parameter          | $\beta_0$ | $\beta_1$ | $\beta_2$ | $\beta_3$ | $\beta_4$ | $\beta_5$ | $\beta_6$ | $\beta_7$ | Overall p-value for model |
|--------------------|-----------|-----------|-----------|-----------|-----------|-----------|-----------|-----------|---------------------------|
| 1. removed xR      | 4.3E-19   | 0.0048    | 3.8E-24   | 0.91      | 0.011     | 0.69      | 0.60      | 0.84      | 1.3E-86                   |
| 2. removed xTxpHxR | 1.6E-28   | 0.00072   | 2.3E-35   |           | 0.0024    | 0.47      | 1.6E-06   | 0.82      | 1E-87                     |
| 3. removed xTxR    | 1.3E-28   | 0.00049   | 1.8E-35   |           | 0.0017    | 0.099     | 4.2E-07   |           | 7E-89                     |
| 4. removed xTxpHxR | 1.7E-28   | 0.00087   | 3.9E-36   |           | 0.0017    |           | 4.3E-16   |           | 1.7E-89                   |

**Table S4.** Fitting parameters and goodness of fit for a non-linear model.

| Mg Dosing ratio                             | Coefficient values |          |           |           |
|---------------------------------------------|--------------------|----------|-----------|-----------|
|                                             | 0                  | 2        | 10        | 30        |
| Intercept ( $\alpha_0$ )                    | 142.0257           | -550.087 | -642.9707 | -776.6539 |
| Temperature ( $\alpha_1$ )                  | -0.5767            | 4.3274   | 2.5417    | 2.5307    |
| pH ( $\alpha_2$ )                           | -39.3614           | 101.9245 | 132.2098  | 162.754   |
| Temperature and pH ( $\alpha_3$ )           | 0.1394             | -0.5155  | -0.3018   | -0.3063   |
| pH <sup>2</sup> ( $\alpha_4$ )              | 2.7044             | -3.6122  | -5.8118   | -7.4916   |
| R <sup>2</sup> Coefficient of Determination | 0.7701             | 0.9097   | 0.9117    | 0.8947    |

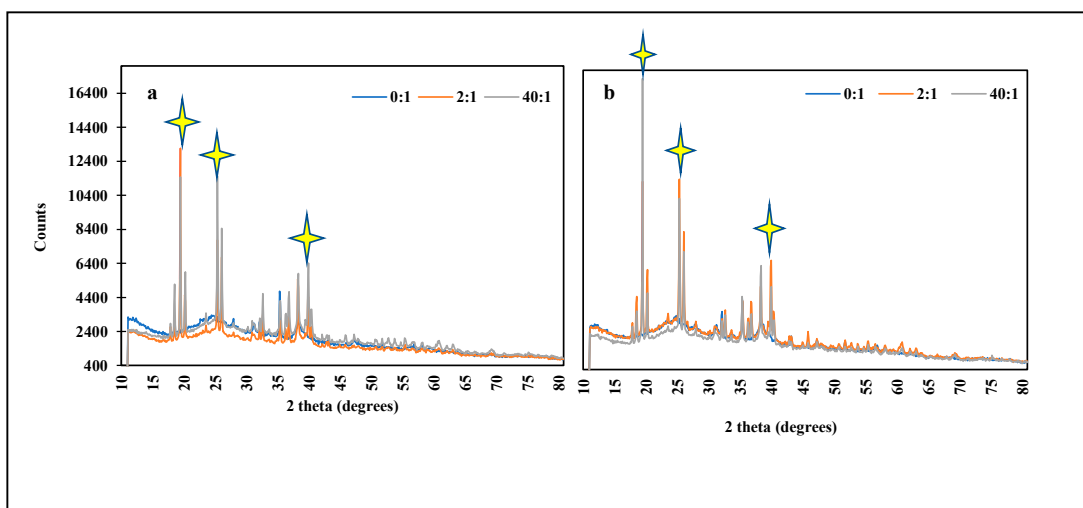

**Figure S5.** Example of XRD diffractograms showing the main struvite peaks in precipitates generated at 20°C at pH 9 (a) and 10 (b) using various Mg:PO<sub>4</sub><sup>3-</sup> ratios.

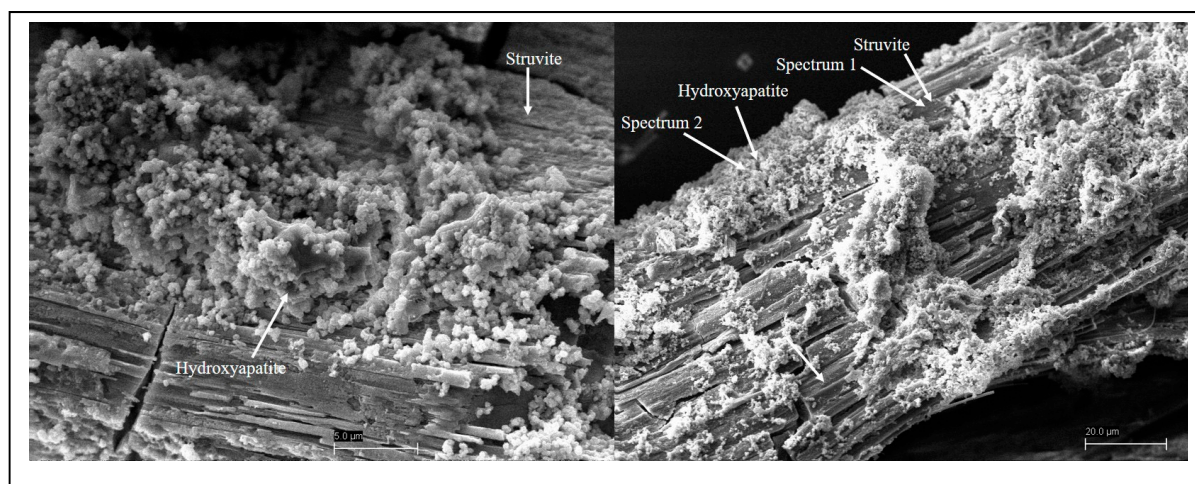

**Figure S6.** SEM micrographs of precipitates generated from AD wastewaters at 20°C and pH 10, showing the presence of both struvite and hydroxyapatite crystals. EDS spectrums of points 1 and 2 are shown in Figure S7.



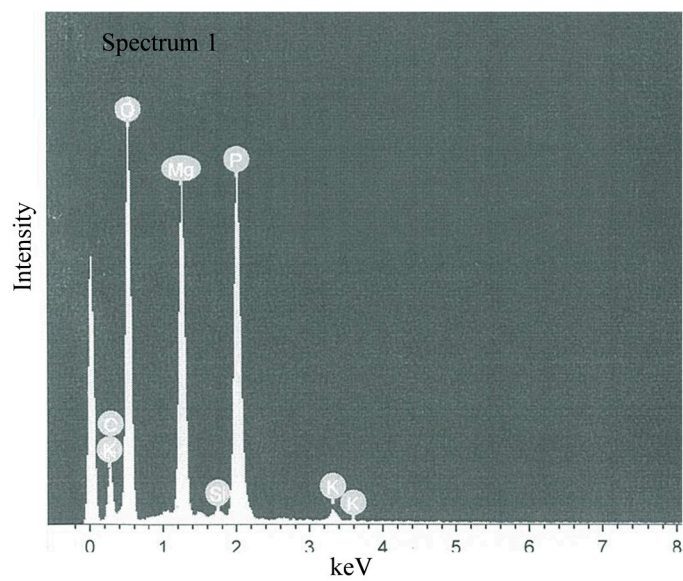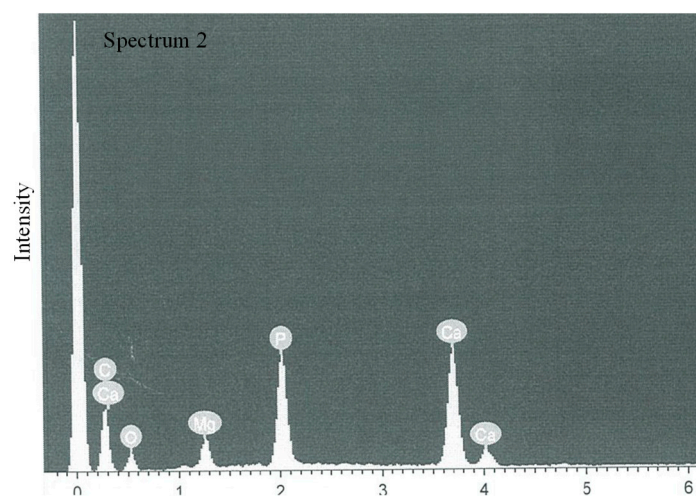

**Figure S7.** Energy Dispersive X-Ray Spectroscopy (EDS) elemental identification of struvite (Spectrum 1) and hydroxyapatite (Spectrum 2) in precipitates recovered from AD wastewater. Location points for spectrums are shown in Figure S6.
